# Supplementary material for: Textural control of ionosilicas by ionic liquid templating
Source: Royal Society of Chemistry journal article supplement (doi:10.1039/d2cp02524h), 2022-01-01
Supplement: d2cp02524h1.pdf [file d2cp02524h1.pdf]

# Textural control of Ionosilicas by Ionic Liquid templating

*Nicole Abdou<sup>1</sup>, Philippe Dieudonné-George<sup>2</sup>, Nicolas Brun<sup>1</sup>, Ahmad Mehdi<sup>1\*</sup>, Peter Hesemann<sup>1\*</sup>.*

<sup>1</sup> ICGM, Univ Montpellier, CNRS, ENSCM, Montpellier, France.

<sup>2</sup> Laboratoire Charles Coulomb (L2C), UMR 5221 CNRS-Univ Montpellier, France

## KEYWORDS

Ionosilica, mesoporosity, sol-gel process, template directed synthesis, ionic liquids.

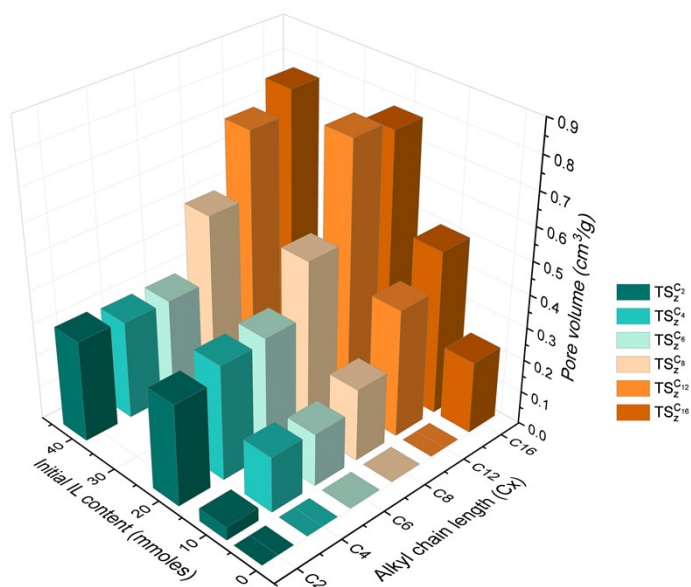

**Figure S1:** Histograms of the pore volume of the IL-free ionosilica ionogel monoliths  $TS_z^{C_x}$ , synthesized in the presence of different amounts of  $[C_x\text{MIM}]\text{TFSI}$  ( $x = 2, 4, 6, 8, 12$  and  $16$ ).

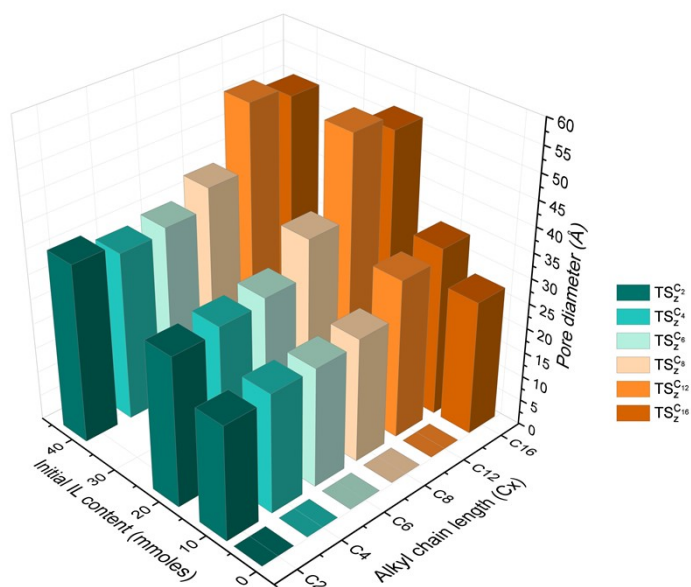

**Figure S2:** Histograms of the pore diameter of the IL-free ionosilica ionogel monoliths  $TS_z^{C_x}$ , synthesized in the presence of different amounts of  $[C_x\text{MIM}]\text{TFSI}$  ( $x = 2, 4, 6, 8, 12$  and  $16$ ).

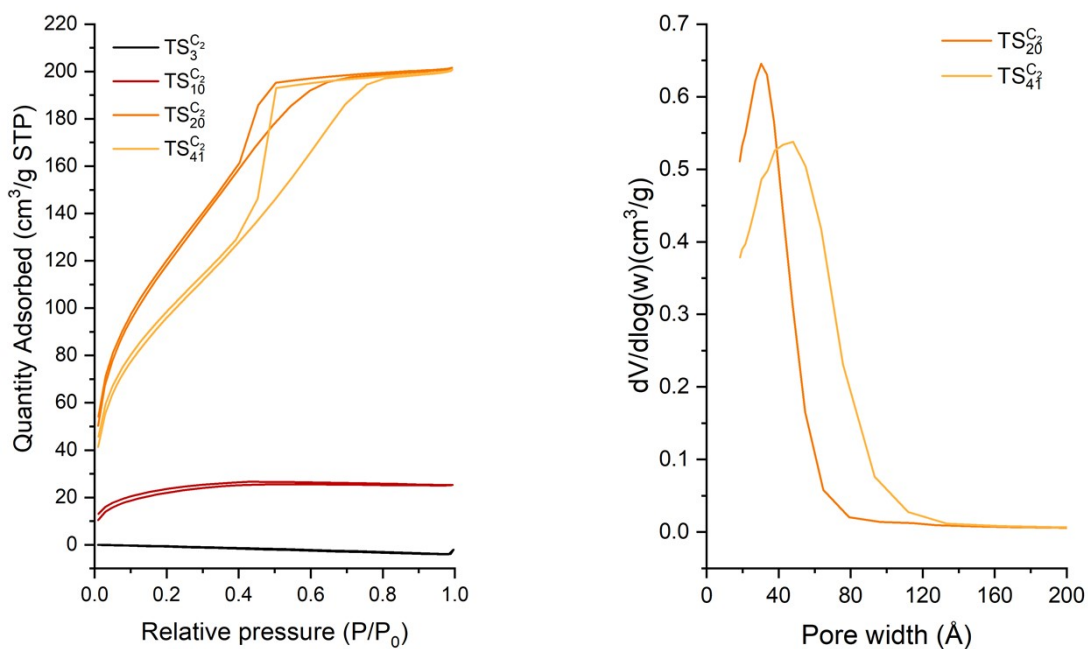

**Figure S3:** Nitrogen sorption isotherms at 77K and BJH adsorption pore distribution of  $TS_z^{C_2}$  monoliths synthesized in the presence of variable amount of  $[C_2MIM]TFSI$  ( $z = 3, 10, 20, 41$ ).

**Figure S4:** Nitrogen sorption isotherms at 77K and BJH adsorption pore distribution of  $TS_z^{C_4}$  monoliths synthesized in the presence of variable amount of  $[C_4MIM]TFSI$  ( $z = 3, 10, 20, 41$ ).

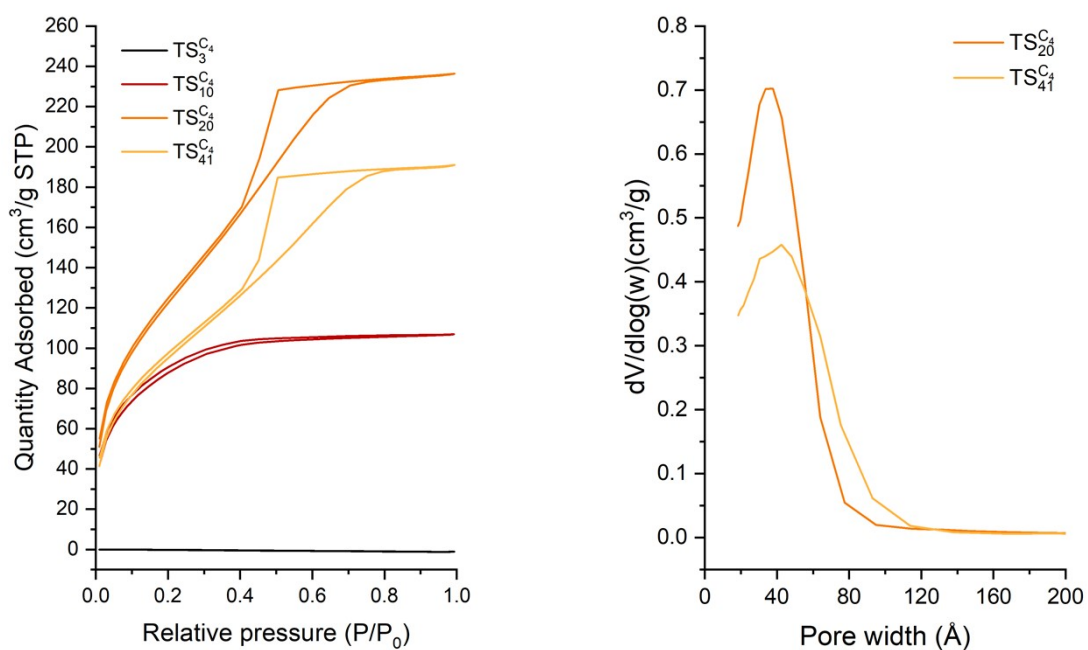

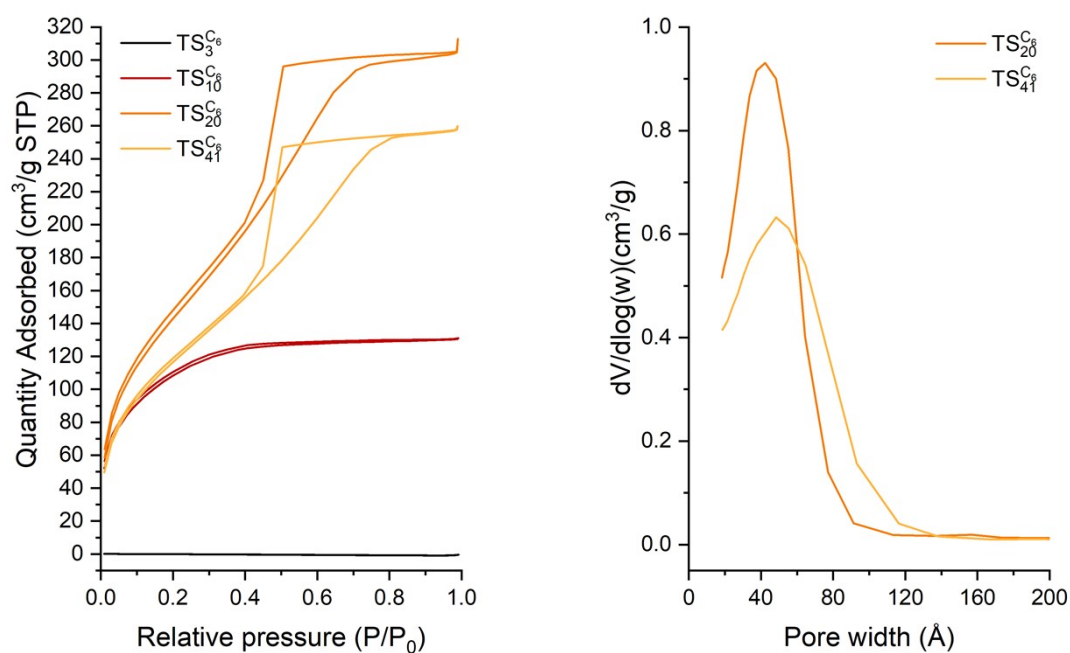

**Figure S5:** Nitrogen sorption isotherms at 77K and BJH adsorption pore distribution of  $TS_z^{C_6}$  monoliths synthesized in the presence of variable amount of [C<sub>6</sub>MIM]TFSI ( $z = 3, 10, 20, 41$ ).

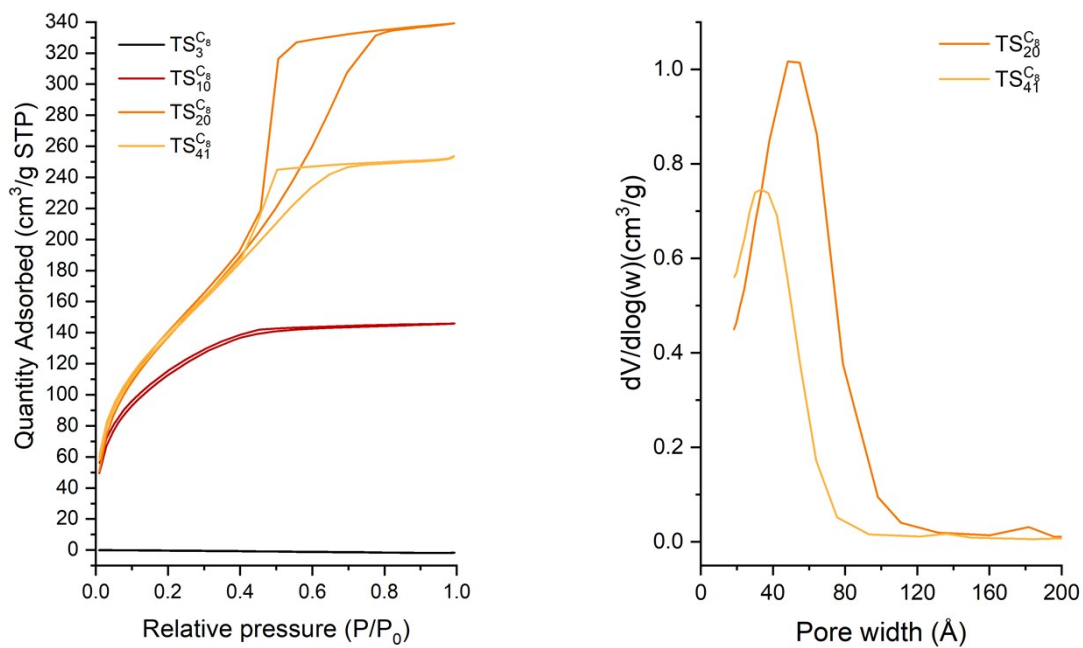

**Figure S6:** Nitrogen sorption isotherms at 77K and BJH adsorption pore distribution of  $TS_z^{C_x}$  monoliths synthesized in the presence of variable amount of  $[C_8MIM]TFSI$  ( $z = 3, 10, 20, 41$ ).

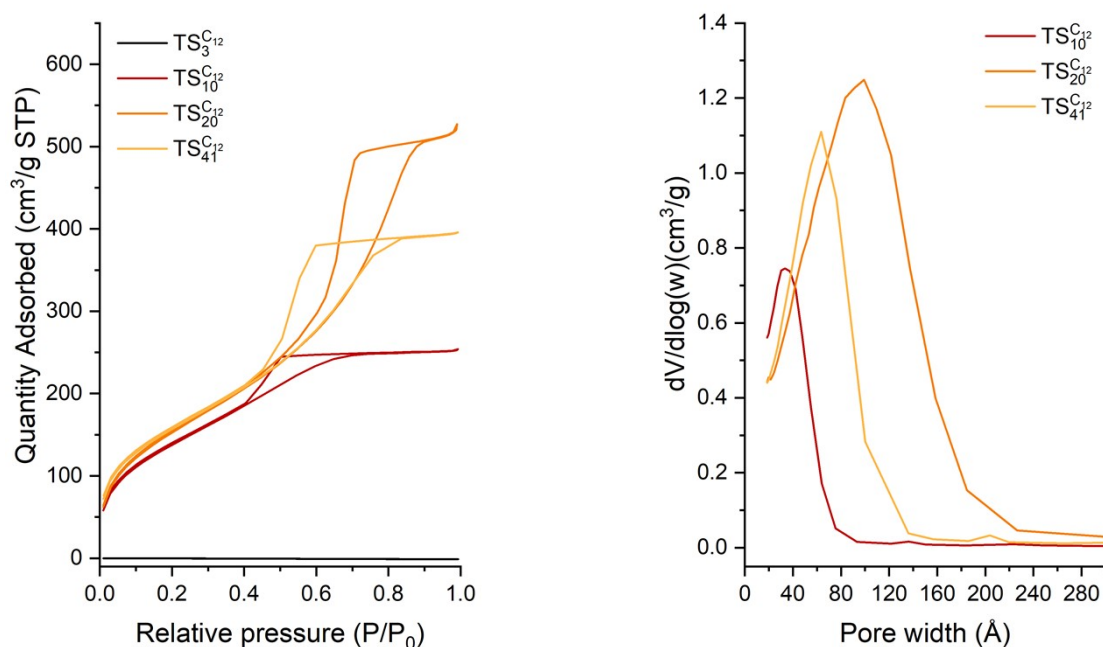

**Figure S7:** Nitrogen sorption isotherms at 77K and BJH adsorption pore distribution of  $TS_z^{C_x}$  monoliths synthesized in the presence of variable amount of  $[C_{12}MIM]TFSI$  ( $z = 3, 10, 20, 41$ ).

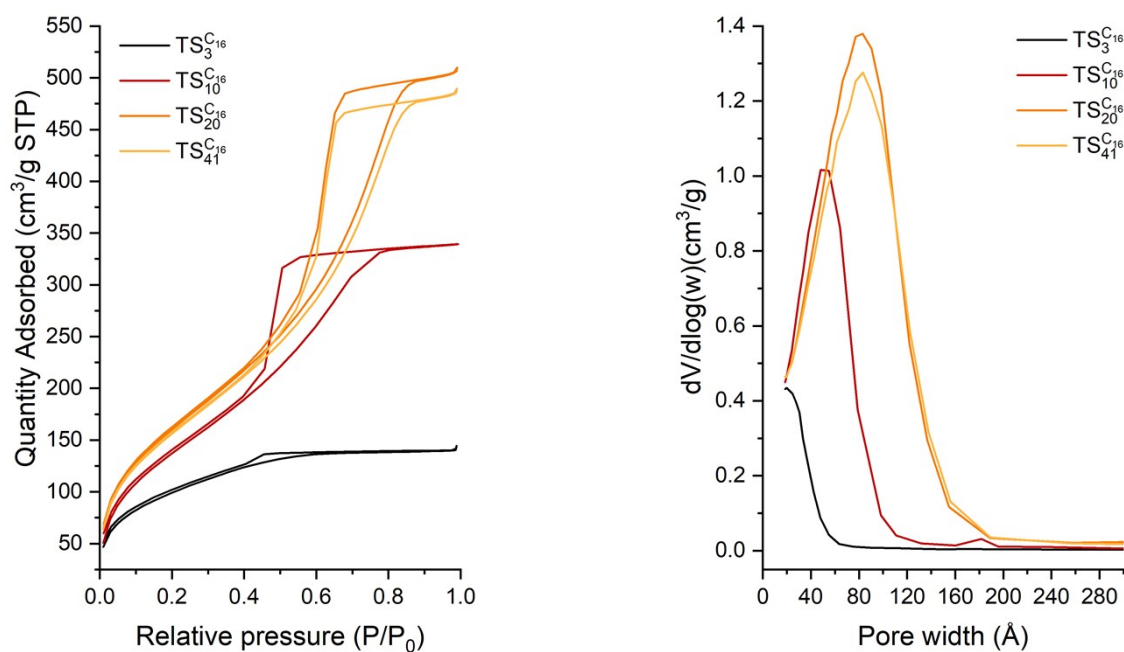

**Figure S8:** Nitrogen sorption isotherms at 77K and BJH adsorption pore distribution of  $TS_z^{C_x}$  monoliths synthesized in the presence of variable amount of  $[C_{16}MIM]TFSI$  ( $z = 3, 10, 20, 41$ ).

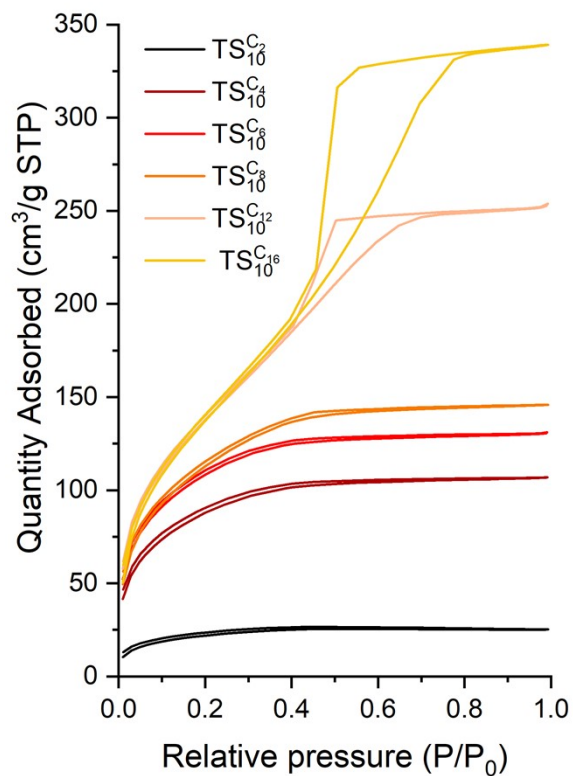

**Figure S9:** Nitrogen sorption isotherms of the ionosilica monoliths synthesized in the presence of 10 mmols of  $[C_xMIM]TFSI$  with variable alkyl chain length ( $x = 2, 4, 6, 8, 12$  and  $16$ ).

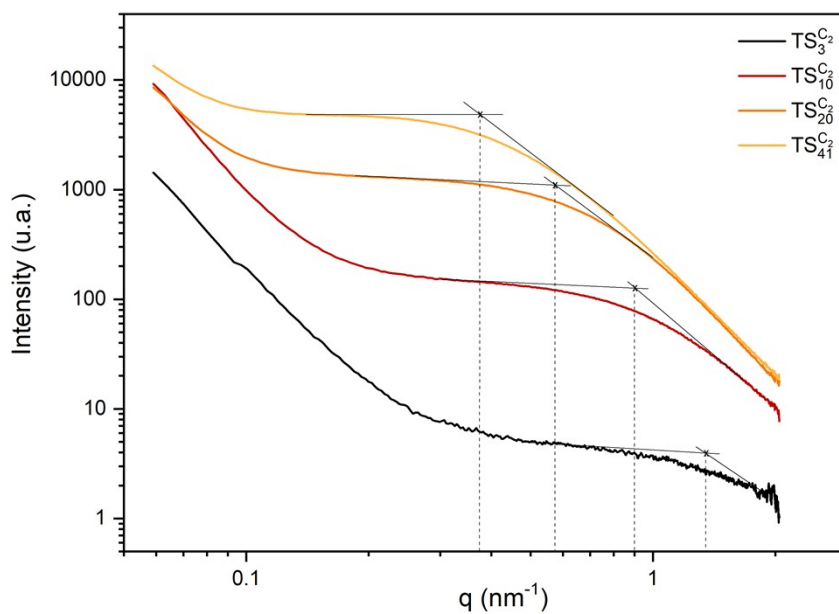

**Figure S10:** SAXS patterns of  $TS_z^{C_2}$  monoliths synthesized in the presence of variable amount of  $[C_2MIM]TFSI$  ( $z = 3, 10, 20, 41$ ).

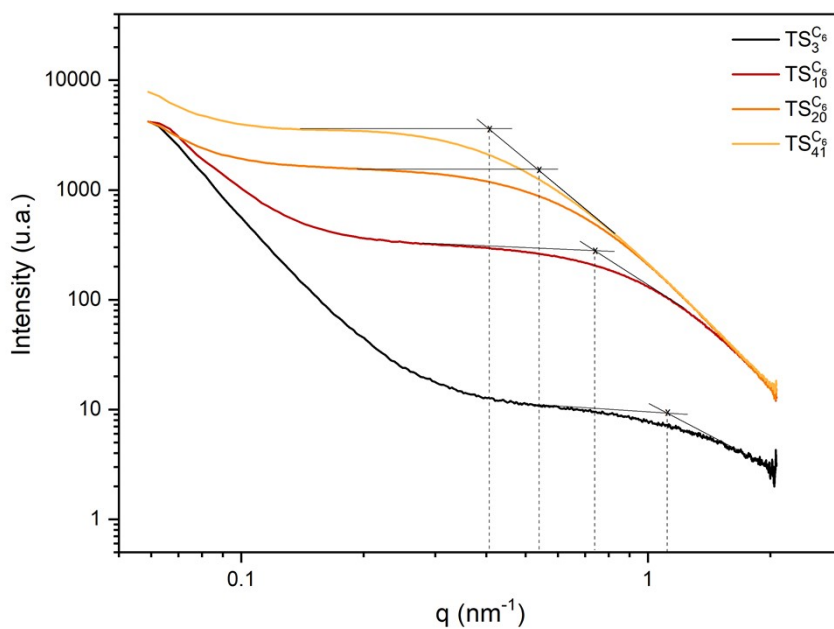

**Figure S11:** SAXS patterns of  $TS_z^{C_6}$  monoliths synthesized in the presence of variable amount of  $[C_6MIM]TFSI$  ( $z = 3, 10, 20, 41$ ).

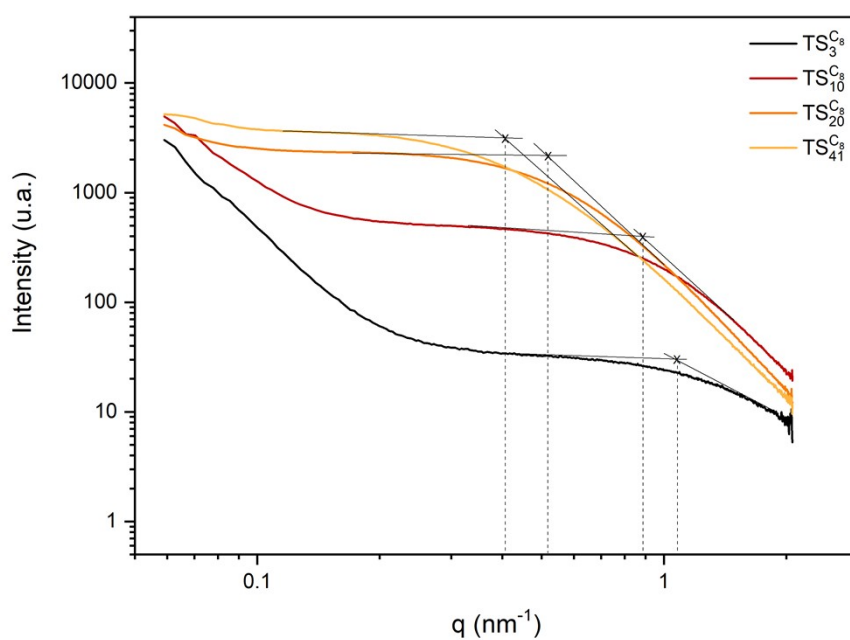

**Figure S12:** SAXS patterns of  $TS_z^{C_8}$  monoliths synthesized in the presence of variable amount of [C<sub>8</sub>MIM]TFSI (z = 3, 10, 20, 41).

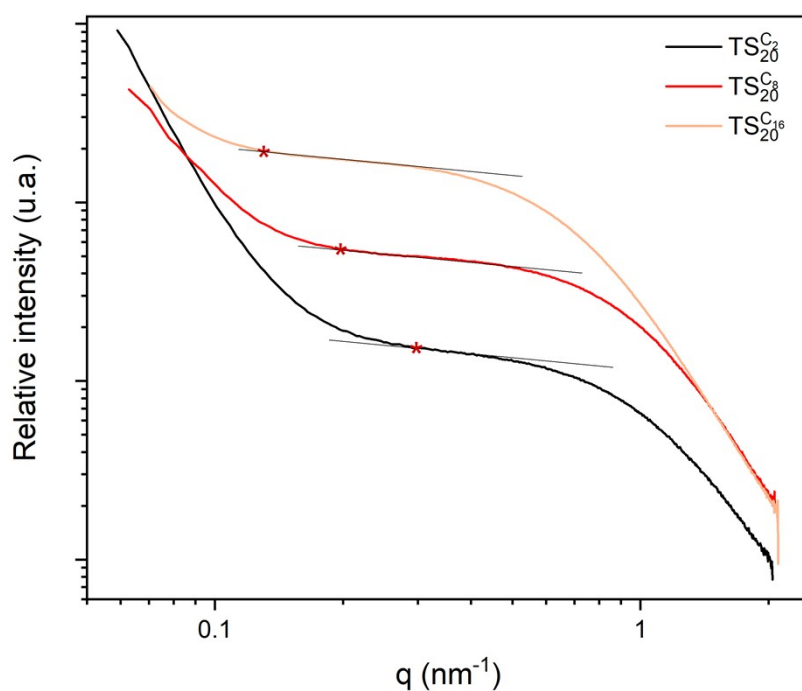

**Figure S13:** SAXS patterns of  $TS_{20}^{C_x}$  monoliths synthesized in the presence of 20 mmoles of [C<sub>x</sub>MIM]TFSI (x = 2, 8 and 16).
